# Supplementary material
Source: Research Square preprint supplement (doi:10.21203/rs.3.rs-9022657/v1)
Supplement: Supplementary file 1 [file 972ceb91eb131cb643530c98.docx]

**Table 2 :** Sociodemographic, health related behaviors, and lung function of study participants

| Participants’ characteristics | N (%)a or Means (standard deviation)b |
| --- | --- |
| Sex  Male  Female | 94 (47.23)a  105 (52.77)a |
| Age (years) | 51.20 (8.32)b |
| Education  Lower than baccalaureate  Equal to baccalaureate  Higher than baccalaureate | 11 (5.52)a  52 (26.13)a  136 (68.35)a |
| Employment  Stable  Retired  Unstable/unemployed  Others | 132 (66.34)a  23 (11.55)a  17 (8.55)a  27 (13.56)a |
| Medication for hypertension  No medication taken for hypertension  Regular medication | 187 (93.97)a  12 (6.03)a |
| Income  Low  Medium  High  Missing value | 60 (30.16)a  66 (33.16)a  67 (33.67)a  6 (3.01)a |
|  |  |
| BMI (kg/m2) | 25.03 (5.55)b |
| Residence  In the central city (Paris)  Out of Paris | 40 (20.10)a  159 (79.90)a |
| Smoking status  Non smoker  Ex-smoker  Occasional smoker  Regular smoker  Missing value | 115 (57.79)a  55 (27.64)a  19 (9.55)a  8 (4.02)a  2 (1.00)a |
| Alcohol consumption  Regular  Frequently  Occasionally  Never | 13 (6.53)a  121 (60.80)a  52 (26.14)a  13 (6.53)a |
| Spirometry measurements  FEV1 (L)  FVC (L) | 3.28 (0.74)b  4.16 (0.99)b |
| Average pollutants concentration between the morning and evening measurements  NO (ppb)  NO2(ppb)  CO (ppb)  O3 (ppb)  BC (ng/m³)  PM2.5 (μg/m3) | 24.09 (20.94)b  11.77 (3.89)b  869.66 (781.12)b  17.00 (6.46)b  1564.84 (1280.33)b  26.32 (87.11)b |
| a N (%)  b Means (standard deviation) | |
