# Supplementary material
Source: Research Square preprint supplement (doi:10.21203/rs.3.rs-9022657/v1)
Supplement: Supplementary file 2 [file bbeac224210a84731e6e0f2c.docx]

**Table 1 :** Overview of air pollution monitors and spirometry used during this study.

| Sensors | Day 1 | Day 2 | Day 3 | Day 4 | Day 5 | Day 6 |
| --- | --- | --- | --- | --- | --- | --- |
| AE51 (Black carbon) | X | X | X | X |  |  |
| PAQM 520 (muti-pollutants) | X | X |  |  | X | X |
| Spirotel 2 (spirometry) | X | X | X |  |  |  |
