# Supplementary material
Source: Research Square preprint supplement (doi:10.21203/rs.3.rs-9022657/v1)
Supplement: Supplementary file 3 [file bcdded57db21900927c5d235.docx]

# Appendix

**Evaluation of the effects of air pollutants on lung function using**

**ambulatory air pollution monitor data from the Mobilisense Project**

**Table A:** Detailed statistics for FEV1, FVC, FEV1/FVC, delta FEV1, and delta FVC (L)

| Outcomes | Mean | Sd | IQR |
| --- | --- | --- | --- |
| FEV1 (morning) | 3.28 | 0.75 | 0.97 |
| FEV1 (evening) | 3.27 | 0.74 | 0.96 |
| CVF (morning) | 4.20 | 1.01 | 1.26 |
| CVF (evening) | 4.12 | 0.96 | 1.29 |
| FEV1/CVF (morning) | 0.78 | 0.08 | 0.10 |
| FEV1/CVF (evening) | 0.79 | 0.08 | 0.10 |
| Delta FEV1 | -0.012 | 0.20 | 0.19 |
| Delta CVF | -0.09 | 0.38 | 0.24 |

**Table B:** Pollutant concentrations averaged between 15 minutes until 6 hours preceding the spirometry measures (n=2504)

| EXPOSURE TIME | NO (ppb) | NO2 (ppb) | CO (ppb) | O3 (ppb) | BC (ng/m³) | PM2.5 (μg/m3) |
| --- | --- | --- | --- | --- | --- | --- |
|  | ***Mean (SD)*** | ***Mean (SD)*** | ***Mean (SD)*** | ***Mean (SD)*** | ***Mean (SD)*** | ***Mean (SD)*** |
| Exposure before morning spirometry test |  |  |  |  |  |  |
| 15 minutes | 20.10(25.03) | 11.34(5.60) | 607.78(504.52) | 14.58(5.28) | 1356.35(2358.49) | 24.46(98.36) |
| 30 minutes | 19.81(24.51) | 11.42(5.48) | 605.30(500.86) | 14.42(5.78) | 1267.37(1747.58) | 22.48(92.32) |
| 1 hour | 19.91(26.61) | 11.34(5.21) | 607.72(508.53) | 14.36(6.19) | 1106.14(1199.71) | 20.72(89.32) |
| 2 hours | 18.25(22.27) | 10.99(4.69) | 605.68(515.52) | 14.22(6.00) | 967.78(962.66) | 19.47(90.35) |
| 3 hours | 17.29(20.28) | 10.76(4.53) | 608.25(518.85) | 14.11(5.73) | 899.55(864.15) | 19.51(99.25) |
| 4 hours | 17.35(26.77) | 10.62(4.44) | 619.38(524.28) | 14.24(6.53) | 864.42(810.13) | 18.55(96.88) |
| 5 hours | 16.87(26.55) | 10.61(4.37) | 604.25(506.94) | 14.33(6.42) | 865.98(822.16) | 17.90(89.31) |
| 6 hours | 17.98(29.33) | 10.64(4.37) | 614.15(505.12) | 14.33(6.38) | 868.28(820.17) | 18.83(86.90) |
| Exposure before evening spirometry test |  |  |  |  |  |  |
| 15 minutes | 19.38(36.81) | 11.90(8.23) | 906.06(1329.24) | 14.59(6.52) | 1632.90(3650.57) | 16.87(56.09) |
| 30 minutes | 20.22(32.30) | 12.29(7.84) | 897.44(1083.27) | 14.87(6.87) | 1616.46(3014.37) | 17.04(55.93) |
| 1 hour | 21.02(26.43) | 12.53(6.78) | 885.91(937.85) | 15.33(6.53) | 1600(2240.82) | 22.36(78.67) |
| 2 hours | 22.63(28.92) | 12.69(6.43) | 994.54(1469.04) | 15.77(6.75) | 1608.82(2011.26) | 28.03(106.89) |
| 3 hours | 22.28(25.14) | 12.60(5.83) | 966.11(1427.46) | 16.31(7.22) | 1749.67(2647.41) | 33.29(128.23) |
| 4 hours | 23.15(23.69) | 12.61(5.29) | 922.07(1141.18) | 16.63(7.22) | 1743.21(2287.75) | 33.12(116.70) |
| 5 hours | 24.20(25.00) | 12.42(5.38) | 897.91(994.58) | 17.09(7.44) | 1696.40(2000.11) | 34.03(121.86) |
| 6 hours | 23.85(26.14) | 12.13(4.83) | 889.35(1002.38) | 17.25(7.28) | 1724.93(2731.92) | 31.48(111.89) |

**Table C:** Fixed effect model for the relationship between BC and O3 averaged for 1h to 2h preceding the spirometry test and forced expiratory volume in 1second (FEV1)

| Pollutants | 1 hour | 2 hours |
| --- | --- | --- |
| BC (μg/m3) | -0.017 (-0.025,-0.008) | -0.020 (-0.034,-0.006) |
| O3 (ppb) | 0.37 (-0.01,0.76) | 0.41 (0.01,0.80) |

***Table D:*** *Fixed effect model for the relationship between NO2 and O3 averaged for 15min to 2h preceding the spirometry test and forced vital capacity (FVC)*

| Pollutants | 15 minutes | 30 minutes | 1 hour | 2 hours |
| --- | --- | --- | --- | --- |
| O3 (ppb) | 0.58 (-0.08,1.25) | 0.57 (-0.04,1.18) | 0.60 (0.03,1.17) | 0.52 (-0.04,1.08) |

**Table E:** Fixed effect model for the relationship between PM2.5 and BC averaged for 15min to 4h preceding the spirometry test and the FEV1/FVC ratio

| Pollutants % | 15minutes | 30minutes | 1 hour | 2 hours | 3 hours | 4 hours |
| --- | --- | --- | --- | --- | --- | --- |
| PM2.5 (μg/ m3) | -0.7(-1.53,0.03) | -0.74(-1.62,-0.04) | -0.60 (-1.27,-0.03) | - | - | - |
| BC (μg/ m3) | - | - | -0.24(-0.44,-0.03) | -0.30(-0.48,-0.12) | -0.16(-0.30,-0.02) | -0.18(-0.34,-0.02) |
