# Supplementary material
Source: Research Square preprint supplement (doi:10.21203/rs.3.rs-9022657/v1)
Supplement: Supplementary file 4 [file e1accde9830752738dde7ab1.docx]

**Table 3:** Beta (β) coefficients and 95% confidence intervals for the relationship between average air pollutant exposure (in the 15min to 4h preceding lung function measurement) and lung function indicators, including forced expiratory volume in 1second (FEV1); forced vital capacity (FVC); and the FEV1/FVC ratio. In models with two pollutants, the two air pollution variables were adjusted for each other. All models were adjusted for covariates (sex, age, income, day of the week, time of day, and smoking status, N=199, observations = 2504)

|  |  | 15 minutes | 30 minutes | 1 hour | 2 hours | 3 hours | 4 hours |
| --- | --- | --- | --- | --- | --- | --- | --- |
| Outcome | **Pollutants %** | **Estimate (CI 95%)** | **Estimate (CI 95%)** | **Estimate (CI 95%)** | **Estimate (CI 95%)** | **Estimate (CI 95%)** | **Estimate (CI 95%)** |
| Forced expiratory volume in 1second FEV1 | | | | | | | |
|  | BC (μg/m3) | _ | _ | -0.016 (-0.024,-0.008) | -0,021 (-0.034,-0.007) | _ | _ |
|  | O3 (ppb) | _ | _ | 0.43 (0.04,0.81) | 0.45 (0.08,0.83) | _ | _ |
| Forced vital capacity FVC | | | | | | | |
|  | O3 (ppb) | 0.64 (0.01,0.129) | 0.62 (0.02,1.22) | 0.64 (0.009,0.11) | 0.67 (0.01,1.12) | _ | _ |
| FEV1 /FVC ratio | | | | | | | |
|  | PM2.5 (μg/m3) | -0.60 (-1.30,-0.03) | -0.70 (-1.39,-0.09) | -0.50 ( -1.10,-0.01) | _ | _ | _ |
|  | BC (μg/m3) | _ | _ | _ | -0.26 (-0.44,-0.09) | -0.15 (-0.29,-0.01) | -0.17 (-0.32,-0.01) |
